# Supplementary material for: Palladium dimethylsilanedithiolato complex: a precursor for Ti–Pd and Ti–Pd2 heterometallic complexesElectronic supplementary information (ESI) available: experimental details and spectroscopic data for 1, 2 and 3. See http://www.rsc.org/suppdata/cc/b2/b201702d/
Source: Royal Society of Chemistry journal article supplement (doi:10.1039/b201702d), 2002-04-08
Supplement: b201702d.doc [file b201702d.doc]

**Supplementary Material (ESI) for Chemical Communications**

**This journal is © The Royal Society of Chemistry 2002**

Synthesis, spectroscopic data and elemental analysis for Pd(S2SiMe2)(PEt3) 1, (C5H5)TiCl(–S)2Pd(PEt3)2 2 and TiCl2(S)(–S)2Pd2(PEt3)4 3.

“Palladium dimethylsilanedithiolate complex: a precursor for Ti-Pd and Ti-Pd2 heterometallic complexes”

By Takashi Komuro, Tsukasa Matsuo, Hiroyuki Kawaguchi and Kazuyuki Tatsumi

All manipulations were carried out under an atmosphere of argon using solvents dried and distilled by appropriate methods.

**Synthesis of Pd(S2SiMe2)(PEt3)2 1.** Treatment of Pd(OAc)2 (0.70 g, 3.1 mmol) with PEt3 (6.9 mmol) in toluene (30 mL) gave a yellow homogeneous solution. When (Me2SiS)3 (3.1 mmol) was added, a color of the solution changed form yellow to red-orange. The reaction mixture was stirred for 2 h at room temperature. To remove an insolble solid, the reaction mixture was centrifuged. The supernatant was concentrated under vacuum. After hexane (15 mL) was added, the solution was cooled to –30 ˚C. Compound **1** was obtained as yellow microcrystals in 88 % yield (1.28 g). Yellow prisms suitable for X-ray analysis were obtained by recrystallization from concentrated Et2O solution at –30 ˚C. 1H NMR (500 MHz, CDCl3),  0.57 (s, 6H, SiMe2), 1.09–1.17 (dt, 18H, PCH2C*H*3), 1.83–1.91 (dq, 12H, PC*H*2CH3). 31P{1H} NMR (202.35 MHz, CDCl3, 85% H3PO4),  20.5 (s). 29Si{1H} NMR (99.25 MHz, CDCl3, SiMe4): 36.1 (t, 3*J*SiP = 2 Hz). IR /cm-1: 1235m, 1227m, 830m (Si–C). UV–VIS (THF): max/nm (/M-1 cm-1) 253 (13000), 263 (13000), 301 (14000), 379 sh (410), 414 (360). Anal. Calcd for C14H36P2PdS2Si: C, 36.16; H, 7.80; S, 13.79. Found: C, 36.07; H, 7.70; S, 13.88%.

**Synthesis of (C5H5)TiCl(–S)2Pd(PEt3)2 2.** Addition of **1** (0.35 g, 0.75 mmol) in toluene (10 mL) to a solution of (C5H5)TiCl3 (0.17 g, 0.78 mmol) in toluene (10 mL) immediately gave a red-orange solution. After stirred for 3 h at room temperature, the mixture was centrifuged. The supernatant was concentrated in vacuo, and then addition of hexane (15 mL) to the solution caused the separation of a yellow solid. After cooling to –30 ˚C, the crude product was obtained by decantation. The resulting solid was recrystallized from toluene/hexane. After washing twice with hexane (5 mL) and drying under vacuum, yellow-orange plates of **2** were isolated (0.30 g, 71% based on Pd). 1H NMR (500 MHz, CDCl3),  1.08–1.17 (dt, 18H, PCH2C*H*3), 1.92–2.15 (m, 12H, PC*H*2CH3), 6.38 (s, 5H, Cp). 31P{1H} NMR (202.35 MHz, CDCl3, 85% H3PO4),  26.5 (s). IR /cm-1: 3108w (Cp). UV–VIS (THF): max/nm (/M-1 cm-1) 240 (38000), 281 (39000), 392 (5600). Anal. Calcd for C17H35ClP2PdS2Ti: C, 36.77; H, 6.35; S, 11.55. Found: C, 36.40; H, 6.37; S, 11.30%.

**Synthesis of TiCl2(S)(–S)2Pd2(PEt3)4 3.** To a yellow solution of **1** (0.44 g, 0.95 mmol) in CH2Cl2 (10 mL) was added a solution of TiCl4(THF)2 (0.15 g, 0.45 mmol) in CH2Cl2 (10 mL) at –50 ˚C. The mixture immediately turned dark-orange solution and was allowed to warm up to room temperature. After stirred for 6 h, the resulting orange solution was concentrated and yellow-orange crystalline solid was formed by slowly addition of Et2O (15 mL). Upon standing overnight at –30 ˚C, yellow-orange powder of **3** were obtained by decantation and drying for 1 h (0.34 g, 84% based on Ti). Yellow-orange plates of **3**•CH2Cl2 suitable for X-ray analysis were afforded by recrystallization from CH2Cl2/Et2O. 1H NMR (500 MHz, CDCl3),  1.08–1.16 (m, 36H, PCH2C*H*3), 1.81–2.03 (m, 24H, PC*H*2CH3). 31P{1H} NMR (202.35 MHz, CDCl3, 85% H3PO4),  19.0 (s). IR /cm-1: 531m (Ti=S). UV–VIS (CH2Cl2): max/nm (/M-1 cm-1) 249 sh (47000), 314 (24000). Anal. Calcd for C25H62Cl4P4Pd2S3Ti: C, 30.47; H, 6.34; S, 9.76. Found: C, 30.86; H, 6.70; S, 10.01%.
